# Supplementary material for: Validation of an Ultraviolet Light Response Gene Signature for Predicting Prognosis in Patients with Uveal Melanoma
Source: MDPI journal article supplement (doi:10.3390/biom13071148), 2023-07-19
Supplement: s1 [file s1]

**Supplementary Figure S1:** Principal Component Analysis (PCA) for uveal melanoma patients grouped as for the high or the low risk group

3D PCA plot for samples

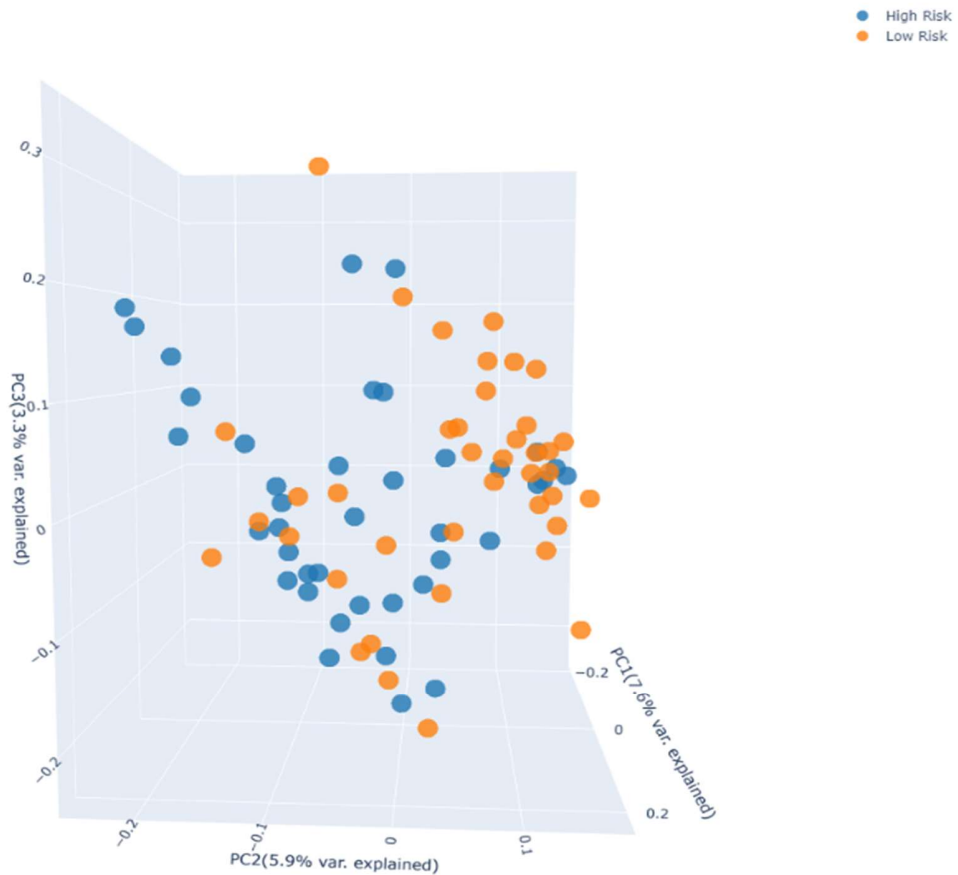

**Supplementary Figure S1:** We conducted a principal component analysis (PCA) to assess the variance explained by different components. The PCA figure revealed that PC1 accounted for 7.6% of the variance, PC2 accounted for 5.9% of the variance, and PC3 accounted for 3.3% of the variance. This indicates that these principal components capture a portion of the variability present in the dataset.
