# Supplementary material for: Validation of an Ultraviolet Light Response Gene Signature for Predicting Prognosis in Patients with Uveal Melanoma
Source: Biomolecules. 2023 Jul 19;13(7):1148. doi: 10.3390/biom13071148 (PMC10377706; doi:10.3390/biom13071148)
Supplement: Supplementary file 1 [file biomolecules-13-01148-s001.zip › Supplementary Table 1.xlsx]

## Sheet: Hoja1
	Supplementary Table 1. Univariate Cox regression of potentially prognostic UV-response-related genes in UM patients
	Gene	coef	HR	95%CI_l	95%CI_u	p.value
	APOM	-1100	0.333	0.202	0.549	0.000
	AP2S1	1417	4124	1636	10398	0.003
	AQP3	1066	2905	1555	5427	0.001
	ARRB2	0.811	2251	1248	4060	0.007
	ATF3	0.550	1734	1120	2684	0.014
	ATP6V1C1	0.573	1774	1190	2643	0.005
	ATP6V1F	1531	4621	1354	15772	0.015
	BID	1700	5476	1730	9336	0.004
	BTG1	-1262	0.283	0.151	0.532	0.000
	BTG3	0.601	1824	1037	3210	0.037
	CASP3	0.578	1783	1021	3113	0.042
	CCND3	-1950	0.142	0.050	0.404	0.000
	CDK2	-1290	0.275	0.140	0.539	0.000
	CDO1	-0.609	0.544	0.353	0.840	0.006
	CEBPG	0.852	2344	1314	4180	0.004
	CHRNA5	1883	6573	2765	8624	0.000
	CLCN2	-1217	0.296	0.114	0.772	0.013
	CLTB	1001	2722	1039	7132	0.042
	CXCL2	2586	7560	3478	10641	0.000
	DGAT1	0.863	2371	1301	4320	0.005
	DNAJA1	0.539	1714	1031	2850	0.038
	E2F5	0.832	2297	1422	3710	0.001
	EIF2C2	0.990	2691	1449	4995	0.002
	EIF2S3	-0.601	0.548	0.302	0.996	0.048
	GCH1	0.833	2300	1467	3605	0.000
	GRINA	0.851	2341	1250	4386	0.008
	GRPEL1	0.893	2443	1110	5378	0.026
	HMOX1	0.757	2132	1504	3022	0.000
	HYAL2	-1181	0.307	0.144	0.656	0.002
	IGFBP2	0.654	1923	1366	2708	0.000
	IL6	2352	5874	3057	9130	0.000
	IRF1	0.377	1458	1197	1777	0.000
	JUNB	0.452	1572	1058	2336	0.025
	KLHDC3	-1039	0.354	0.162	0.772	0.009
	LYN	0.791	2206	1462	3329	0.000
	MAOA	-1125	0.325	0.091	1160	0.083
	MRPL23	1027	2792	1348	5783	0.006
	MSX1	1403	4068	2027	8165	0.000
	NAT1	1224	3402	1539	7520	0.002
	NPTX2	0.594	1811	1204	2727	0.004
	OLFM1	0.666	1947	1258	3012	0.003
	PARP2	0.878	2406	1221	4738	0.011
	PDAP1	2036	7662	2297	9561	0.001
	POLR2H	-2330	0.097	0.019	0.509	0.006
	PPIF	1676	5346	2009	14226	0.001
	PRKACA	1235	3439	1203	9829	0.021
	PRKCD	-1246	0.288	0.158	0.524	0.000
	PSMC3	1649	5202	1891	14311	0.001
	RHOB	0.607	1834	1076	3128	0.026
	RXRB	-1396	0.248	0.125	0.491	0.000
	SEPW1	1156	3178	1431	7058	0.004
	SIGMAR1	1010	2745	1091	6911	0.032
	SLC6A8	-1063	0.345	0.143	0.835	0.018
	SOD2	0.505	1657	1094	2510	0.017
	SQSTM1	0.829	2291	1057	4965	0.036
	STARD3	1281	3601	1240	10460	0.019
	STIP1	0.971	2641	1167	5976	0.020
	SULT1A1	0.361	1435	1096	1880	0.009
	TAP1	0.367	1443	1168	1782	0.001
	TCHH	2150	8587	1931	10184	0.005
	WIZ	-2738	0.065	0.012	0.352	0.002
